# Supplementary material for: Lipid phosphate phosphatase inhibitors locally amplify lysophosphatidic acid LPA1 receptor signalling in rat brain cryosections without affecting global LPA degradation
Source: PubMed Central journal article supplement (PMC3418163; doi:10.1186/1471-2210-12-7), 2012-06-11
Supplement: 1471-2210-12-7-S3.pdf [file 1471-2210-12-7-S3.pdf]

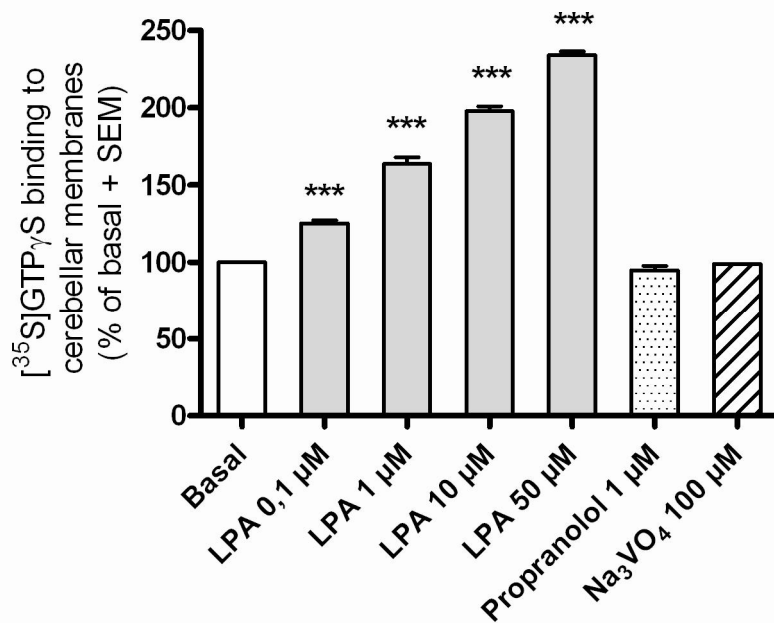

**Additional file 3. Propranolol and Na<sub>3</sub>VO<sub>4</sub> do not act as direct agonists for LPA<sub>1</sub> receptors.** Classical [<sup>35</sup>S]GTP<sub>γ</sub>S membrane binding assay was performed as described in Methods. Propranolol and Na<sub>3</sub>VO<sub>4</sub> are not able to stimulate [<sup>35</sup>S]GTP<sub>γ</sub>S binding to the rat cerebellar membranes, whereas exogenous LPA evokes a dose-dependent response. The data represent the percentage of bound radioactivity + SEM from three independent experiments performed in duplicate (n=3). Significance level: \*\*\**p* < 0.001 compared to basal.
