# Supplementary material for: Lipid phosphate phosphatase inhibitors locally amplify lysophosphatidic acid LPA1 receptor signalling in rat brain cryosections without affecting global LPA degradation
Source: PubMed Central journal article supplement (PMC3418163; doi:10.1186/1471-2210-12-7), 2012-06-11
Supplement: 1471-2210-12-7-S7.pdf [file 1471-2210-12-7-S7.pdf]

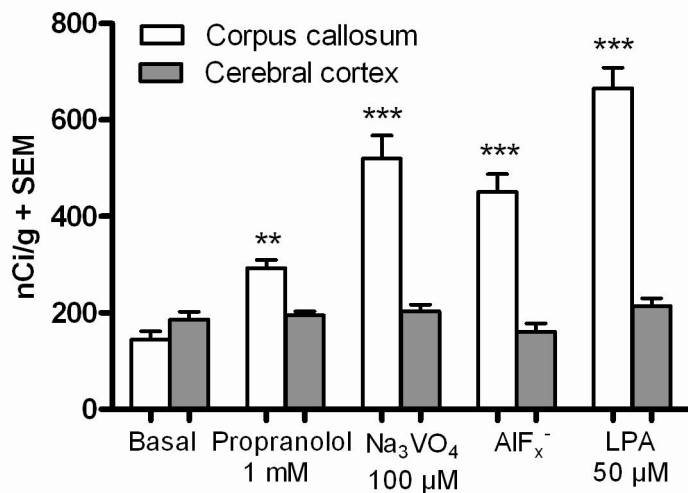

**Additional file 7. Inhibitor-evoked [<sup>35</sup>S]GTP $\gamma$ S binding responses are restricted to white matter areas of rat brain.** Coronal brain sections were incubated using a three-step autoradiography protocol as detailed in Methods. AlF<sub>x</sub><sup>-</sup> (NaF 10 mM + AlCl<sub>3</sub> 50 μM) was included during the 40 min preincubation step (step 1) and other test chemicals during the [<sup>35</sup>S]GTP $\gamma$ S labelling step (step 3). Step 3 additionally contained 0.1 % BSA. Autoradiography films were digitized and [<sup>35</sup>S]GTP $\gamma$ S binding was quantified from the corpus callosum (representing white matter) or from cerebral cortex (representing grey matter), as described in Methods. Quantitative data are calculated as nCi/g equivalents with non-specific binding subtracted from total binding. The data are expressed as mean + SEM from six individual animals (n=6). Significance level: \*\*\**p* < 0.001 and \*\**p* < 0.01 compared to basal in each brain region.
